# Supplementary material
Source: publisher site journal article supplement (https://www.dovepress.com/get_supplementary_file.php?f=247794.xlsx)
Supplement: Supplementary file 1 [file get_supplementary_file.php]

## Sheet: up-regulated genes 6h
Names	total	elements
BB 6h MRT 6h	7	Ccl7
		Cxcl10
		Ccl9
		Rsad2
		Cxcl11
		Ifit3
		Ccl2
MRT 6h	14	S100a9
		Cdkn1a
		S100a8
		Cxcl1
		Angptl4
		Steap4
		Ccl3
		Sele
		Ccl20
		Cxcl2
		Gdf15
		Tfpi2
		Ptges
		Il1b
BB 6h	1	Mgmt

## Sheet: up-regulated genes 48h
Names	total	elements
BB 48h MRT 48h	2	Mmp10
		Mgmt
MRT 48h	4	Cdkn1a
		Cd8a
		Ephx1
		Lilrb4
BB 48h	2	Mmp13
		Areg

## Sheet: up-regulated genes 8d
Names	total	elements
BB 8d MRT 8d	104	Cd69
		Cxcr3
		Igsf6
		Scin
		Cd8a
		Cybb
		Csf2ra
		Clec10a
		Mgmt
		Rsad2
		Slamf9
		RT1-S3
		Tnfrsf14
		Ly86
		Evi2b
		RGD1565356
		Rhoh
		Tcrb
		Itgal
		Napsa
		Mmp10
		Ly6c
		Arhgap30
		Slpi
		Fcnb
		Slc28a2
		Ltb
		Tfec
		Cd5
		Ctse
		Ccl7
		Clec9a
		Ptpn22
		Itgax
		Tbc1d10c
		Ccl5
		Gbp4
		Rgs18
		Rac2
		Rgs1
		LOC685067
		Batf
		Nfam1
		Mnda
		Clec4a3
		Cd3g
		Sash3
		Irgm2
		Ms4a6a
		Lck
		Tlr1
		Cp
		Pla2g2d
		Ddx60
		Lilrb4
		Cxcl11
		LOC290071
		LOC24906
		LOC100911030
		Irf7
		Cst7
		Plek
		Il1b
		Gimap7
		Ms4a6bl
		Pkib
		Cd68
		Nlrc5
		Ccr5
		Clec4a
		Ciita
		Ctsc
		RT1-Db1
		Il10ra
		Cytip
		LOC103691468
		Serpinb6b
		Gcsam
		Clec12a
		Plac8
		Irf8
		Ms4a7
		Mx1
		Spic
		Bcl2a1
		Hcst
		Fam26f
		Mrc1
		P2ry10
		Ptprc
		Cxcl10
		Clec7a
		Il7r
		Gzmb
		Tagap
		Cd3d
		2020-03-01
		Cxcl1
		Klra17
		Fcgr1a
		Zbp1
		Atp8b4
		Tlr8
		Slfn4
MRT 8d	291	P2ry6
		Adap2
		Cd38
		Dapp1
		Npl
		LOC100912724///LOC691603///Mcpt8
		Mreg
		Klrk1
		Ccl6
		Cd74
		Dsc2
		Angptl4
		Jchain
		Arrdc4
		Icos
		Ly75
		Ctsz
		Pla2g4a
		Tap1
		Sema4a
		Fgr
		Lpxn
		Hcls1
		Mcpt2
		Rabgap1l
		Itgb7
		Myo1g
		Prr15
		Tmem173
		Rasa4
		Lilrb3l
		Ifit3
		Smco4
		Cd7
		Ifi30
		Cfb///C2
		Rab27a
		Papss2
		Cd2
		Smpdl3a
		Cd3e
		Sh2d1a
		Ccl9
		Slc15a3
		Ptprcap
		LOC102548199
		Man1a1
		Arl5c
		St8sia4
		Ephx1
		Klrb1c
		Fam78a
		Pctp
		Bst1
		Laptm5
		Runx3
		Cdkn1a
		Prkch
		LOC688090///RT1-Bb
		Birc3
		Myo1f
		Mafb
		Gpx2
		Capn13
		P2ry14
		Cd83
		IgG-2a
		Samsn1
		Plbd1
		Htr7
		Map4k1
		Scn7a
		LOC100909797///RT1-T24-3
		Slfn5
		Coro1a
		Tbc1d4
		Mmp7
		Pik3ap1
		Cxcr4
		Cyba
		LOC102549198
		Stat1
		Tmem140
		Eomes
		Pou2af1
		Ptpro
		Dusp2
		LOC681383
		Rnf125
		Gimap1
		Tlr2
		Ncf4
		Klre1
		Cd53
		LOC100909630///RT1-DMb
		Dram1
		Dock11
		RGD1311300
		LOC100910669
		Plxnc1
		LOC102556623///Abcg3l4///Abcg3l2
		Cd300a
		C5ar1
		Ly6e
		Gzmm
		Vav1
		Hmox1
		Ccl4
		Arhgap9
		Rab32
		RT1-EC2
		Unc93b1
		Pygl
		Ifi44l
		Ctla2a
		LOC681290
		Igtp
		LOC314509///Igh-6
		Itgb2
		Tifab
		Klhl6
		Ifitm1
		Lst1
		Lilra3///Lilrb1///Lilrb3b///LOC690948///Lilrb3a///Lilrb3l
		Cdh17
		LOC100909928
		Samhd1
		RGD2301395///Klrb1a
		Tifa
		Trat1
		Fcgr2b
		Ccl17
		Neurl3
		Cxcl16
		Cxcl13
		Rassf4
		Mcoln2
		Oasl
		Kmo
		C3
		LOC102549198///MGC108823
		Stat4
		Fcgr3a
		Nrros
		Btg2
		Clic2
		Igkc
		Art2b
		LOC366772///Igha
		Lyn
		LOC100909593///RT1-DMa
		Klrd1
		Prf1
		Gimap4
		Folr2
		LOC100912724///LOC691603///Mcpt8l2///Mcpt9///Mcpt10///Mcpt8
		Fgl2
		Ccr1
		Skap1
		Dnase1l3
		LOC102555173
		Ptpn6
		Xcl1
		Colec12
		Fcna
		Dennd1c
		Pdpn
		Milr1
		Ccdc69
		LOC100910973
		Dsg2
		Cfp
		Slc31a2
		Ctrc
		Bcl2l14
		Cd33
		Plin2
		Tlr7
		Fes
		Tfpi2
		Map3k8
		Gzmk
		Trim14
		Cd1d1
		Cd14
		Lcp2
		Btk
		Cd86
		Steap4
		Irgm
		LOC680329
		Adgrg5
		Il4r
		Cd163
		Ptpn18
		F10
		Ccl2
		RT1-Ba
		Rnase2
		Rarres1
		RGD1305807
		Fgd2
		Cd40
		Qpct
		Rbm47
		Il2rg
		Gpnmb
		Ubd
		Adam8
		Lgals3
		Ass1
		Slc16a10
		Pstpip1
		Mcpt10
		Gmfg
		Rftn1
		Cd8b
		Bcl3
		Gimap5
		Herc6
		Ifng
		Card11
		Traf1
		Dennd2d
		Naaa
		Man2a1
		Nckap1l
		Il1a
		Arhgdib
		Epsti1
		Srgn
		Armc3
		LOC100911163///LOC691695///Gzmc
		Cd247
		Nkg7
		Tbxas1
		Ccr2
		Ebi3
		Tnfrsf1b
		Tnfaip3
		2020-09-01
		Plau
		S100a9
		Tnfaip8l2
		Gch1
		Adgre1
		Fyb
		Cmah
		Mpeg1
		Zap70
		Fam46c
		Stx11
		Fermt3
		Lcp1
		Chi3l1
		LOC100911545///A2m
		Atf3
		Il18bp
		LOC100912479///Vcam1
		Nfkbiz
		Mab21l3
		Nxpe4
		Ms4a1
		LOC100909725///Kcnk6
		Cfd
		Clec4a1
		Klrc2
		Acp5
		Ccr6
		LOC100912449
		Kctd12
		Tnfsf10
		Ly49i4///Ly49s7///Klra5///Ly49i2
		RT1-Da
		Mbnl3
		Mertk
		Igf1
		Tmem37
		RGD1561778
		Lat
		Slfn2
		Tlr4
		Hck
		Serping1
		Il2rb
		Nabp1
		Ncf1
		Serpina3n
		Cxcl9
		Bst2
		MGC105649

## Sheet: down-regulated genes 6h
Names	total	elements
BB 6h MRT 6h	1	Cdc20
MRT 6h	2	P2ry12
		Fam64a

## Sheet: down-regulated genes 48h
Names	total	elements
MRT 48h	4	LOC100910855///Ogn
		Col8a2
		Omd
		Inmt
BB 48h	4	Slc17a7
		Cirbp
		Cdc20
		Cck

## Sheet: down-regulated genes 8d
Names	total	elements
BB 8d MRT 8d	13	Fbln5
		Eln
		Cped1
		Prrx2
		C1qtnf1
		Nr2f2
		Twist1
		Col18a1
		Inmt
		LOC100910855///Ogn
		Omd
		Col6a2
		Col1a1
MRT 8d	160	Selenbp1
		Arhgap28
		Cdkn2a
		Six1
		Mnd1
		LOC102553715///Mfap4
		Efnb1
		Col5a1
		Ccdc80
		Mid1
		Id3
		P3h4
		Capn3
		Exoc3l2
		Etv1
		Msln
		Glt8d2
		Wisp1
		Rai14
		Glod5
		Gata2
		Col7a1
		Col8a1
		Parva
		Tfap2a
		Msrb3
		Fkbp10
		Dysf
		Bnc2
		LOC100910384///Col23a1
		Prrx1
		Pcolce
		Ahnak2
		Calml4
		Col5a2
		Kazald1
		Tpm1
		Fzd2
		Medag
		Col6a3
		Ibsp
		Gpx7
		Asgr1
		Crlf1
		LOC102555594
		Rnd3
		Igsf3
		Cpz
		Id1
		Frk
		Mpz
		Trib2
		Mical2
		Pdgfrb
		Fam64a
		Rlbp1
		Six4
		Igfbp6
		Ackr4
		Kank2
		Ccm2l
		Rgs12
		Lox
		LOC102550080///Plac1
		Vash2
		Olfml2a
		Scarf2
		Col6a1
		Col1a2
		Pkp1
		Cald1
		Emilin1
		Lama4
		Casq1
		Clmp
		Ttc28
		Tmem119
		Sox4
		Ocm2
		Slc6a4
		Adamts12
		Lrrc15
		Zfhx4
		Ltbp4
		Mageb16
		Ltbp2
		Igfbp5
		E2f7
		MGC114427
		Psca
		Angptl2
		Sfrp4
		Aqp1
		Col8a2
		Msx1
		Snai1
		Mfap5
		Foxs1
		Mex3a
		Rida
		Shox2
		Hoxc9
		Top2a
		Adgrl2
		Tnnt2
		Sema3f
		Wif1
		Eva1c
		Itgbl1
		Adamts8
		Cxcl12
		Col3a1
		Fat4
		Nid1
		Itgb5
		Sncg
		Pgf
		Lrig3
		Bgn
		Gulp1
		Aspn
		Lrrc71
		Mrgprf
		Ednra
		LOC100912608///LOC100911668///LOC100909714
		Gli1
		Pdgfra
		Hoxa5
		Fam69c
		Pcdh18
		Tns2
		Ecm1
		Enpp1
		Pxdn
		Slc29a1
		C1qtnf2
		Lbp
		Draxin
		Vcan
		Prss22
		Osr2
		Nid2
		Olfml2b
		Dscc1
		Nt5dc2
		Copz2
		Ppl
		Mylk3
		Slit2
		LOC100911932///LOC100911882///Cd248
		Spry1
		Mfap2
		Unc5b
		Olfml3
		Col6a6
		Fstl1
		Serpinf1
		Amot
		Srpx2
		Wls
BB 8d	6	Neurod6
		Slc17a7
		Nptx1
		Sstr1
		Cck
		Pde1a
